# Supplementary material for: A nitrogen-doped carbon nanosheet/poly(amidoamine) dendrimer-based electrochemical sensor for nicotine in flavored hookah pipe tobacco
Source: Royal Society of Chemistry journal article supplement (doi:10.1039/d4ay01257g), 2024-01-01
Supplement: d4ay01257g1.pdf [file d4ay01257g1.pdf]

## Nitrogen-Doped Carbon Nanosheet/Poly(amidoamine) Dendrimer-based Electrochemical Sensor for Nicotine in Flavored Hookah Pipe Tobacco

Sesethu Makaluza<sup>1,2</sup>, Nyasha Midzi<sup>1,2</sup>, Foluke O.G. Olorundare<sup>1</sup>, Dimpo S. Sipuka<sup>1,2</sup>,  
Tsholofelo I. Sebokolodi<sup>1,2</sup>, Duduzile Nkosi<sup>1,2</sup>, Omotayo A. Arotiba\*<sup>1,2</sup>

<sup>1</sup> Department of Chemical Sciences, University of Johannesburg, Doornfontein, 2028, South  
Africa

<sup>2</sup> Centre for Nanomaterials Science Research, University of Johannesburg, South Africa

Corresponding author: Omotayo A. Arotiba ([oarotiba@uj.ac.za](mailto:oarotiba@uj.ac.za))

### Supplementary Data File

Data file for Fig 3a: CV of bare and modified electrodes

| Bare<br>GCE |         | GCE-<br>CNS |         | GCE-<br>PAMAM |         | GCE-CNS-<br>PAMAM |         |
|-------------|---------|-------------|---------|---------------|---------|-------------------|---------|
| E /V        | I /uA   | E /V        | I /uA   | E /V          | I /uA   | E /V              | I /uA   |
| -0,2        | -32,172 | -0,2        | -26,086 | -0,2          | -28,936 | -0,2              | -32,483 |
| -0,19       | -31,176 | -0,19       | -25,277 | -0,19         | -27,592 | -0,19             | -31,599 |
| -0,18       | -30,293 | -0,18       | -24,642 | -0,18         | -26,633 | -0,18             | -30,84  |
| -0,17       | -29,484 | -0,17       | -24,07  | -0,17         | -25,824 | -0,17             | -30,156 |
| -0,16       | -28,737 | -0,16       | -23,572 | -0,16         | -25,14  | -0,16             | -29,533 |
| -0,15       | -28,027 | -0,15       | -23,111 | -0,15         | -24,53  | -0,15             | -28,936 |
| -0,14       | -27,355 | -0,14       | -22,688 | -0,14         | -23,97  | -0,14             | -28,376 |
| -0,13       | -26,708 | -0,13       | -22,302 | -0,13         | -23,46  | -0,13             | -27,853 |
| -0,12       | -26,073 | -0,12       | -21,916 | -0,12         | -22,987 | -0,12             | -27,355 |
| -0,11       | -25,476 | -0,11       | -21,555 | -0,11         | -22,539 | -0,11             | -26,87  |
| -0,1        | -24,878 | -0,1        | -21,207 | -0,1          | -22,091 | -0,1              | -26,409 |
| -0,09       | -24,294 | -0,09       | -20,883 | -0,09         | -21,68  | -0,09             | -25,961 |
| -0,08       | -23,709 | -0,08       | -20,56  | -0,08         | -21,282 | -0,08             | -25,501 |
| -0,07       | -23,136 | -0,07       | -20,236 | -0,07         | -20,908 | -0,07             | -25,09  |
| -0,06       | -22,564 | -0,06       | -19,95  | -0,06         | -20,547 | -0,06             | -24,654 |
| -0,05       | -21,979 | -0,05       | -19,639 | -0,05         | -20,186 | -0,05             | -24,244 |
| -0,04       | -21,406 | -0,04       | -19,365 | -0,04         | -19,825 | -0,04             | -23,821 |
| -0,03       | -20,821 | -0,03       | -19,054 | -0,03         | -19,477 | -0,03             | -23,422 |
| -0,02       | -20,224 | -0,02       | -18,78  | -0,02         | -19,116 | -0,02             | -22,999 |
| -0,01       | -19,601 | -0,01       | -18,494 | -0,01         | -18,718 | -0,01             | -22,576 |
| 0           | -18,979 | 0           | -18,195 | 0             | -18,369 | 0                 | -22,153 |
| 0,01        | -18,332 | 0,01        | -17,909 | 0,01          | -17,983 | 0,01              | -21,717 |
| 0,02        | -17,66  | 0,02        | -17,598 | 0,02          | -17,573 | 0,02              | -21,257 |
| 0,03        | -16,95  | 0,03        | -17,249 | 0,03          | -17,162 | 0,03              | -20,771 |
| 0,04        | -16,204 | 0,04        | -16,913 | 0,04          | -16,714 | 0,04              | -20,249 |
| 0,05        | -15,42  | 0,05        | -16,527 | 0,05          | -16,216 | 0,05              | -19,664 |

|      |         |      |         |      |         |      |         |
|------|---------|------|---------|------|---------|------|---------|
| 0,06 | -14,586 | 0,06 | -16,092 | 0,06 | -15,668 | 0,06 | -19,004 |
| 0,07 | -13,677 | 0,07 | -15,581 | 0,07 | -15,021 | 0,07 | -18,257 |
| 0,08 | -12,694 | 0,08 | -14,996 | 0,08 | -14,312 | 0,08 | -17,349 |
| 0,09 | -11,611 | 0,09 | -14,25  | 0,09 | -13,428 | 0,09 | -16,241 |
| 0,1  | -10,404 | 0,1  | -13,316 | 0,1  | -12,395 | 0,1  | -14,897 |
| 0,11 | -9,084  | 0,11 | -12,146 | 0,11 | -11,126 | 0,11 | -13,217 |
| 0,12 | -7,591  | 0,12 | -10,653 | 0,12 | -9,57   | 0,12 | -11,126 |
| 0,13 | -5,923  | 0,13 | -8,699  | 0,13 | -7,641  | 0,13 | -8,487  |
| 0,14 | -4,044  | 0,14 | -6,209  | 0,14 | -5,226  | 0,14 | -5,239  |
| 0,15 | -1,94   | 0,15 | -3,061  | 0,15 | -2,289  | 0,15 | -1,256  |
| 0,16 | 0,387   | 0,16 | 0,785   | 0,16 | 1,283   | 0,16 | 3,474   |
| 0,17 | 2,963   | 0,17 | 5,465   | 0,17 | 5,552   | 0,17 | 8,987   |
| 0,18 | 5,847   | 0,18 | 10,892  | 0,18 | 10,543  | 0,18 | 15,235  |
| 0,19 | 8,894   | 0,19 | 17,002  | 0,19 | 16,144  | 0,19 | 22,031  |
| 0,2  | 12,166  | 0,2  | 23,586  | 0,2  | 22,367  | 0,2  | 29,15   |
| 0,21 | 15,603  | 0,21 | 30,407  | 0,21 | 28,913  | 0,21 | 36,319  |
| 0,22 | 19,183  | 0,22 | 37,091  | 0,22 | 35,622  | 0,22 | 43,276  |
| 0,23 | 22,842  | 0,23 | 43,326  | 0,23 | 42,156  | 0,23 | 49,661  |
| 0,24 | 26,499  | 0,24 | 48,752  | 0,24 | 48,304  | 0,24 | 55,249  |
| 0,25 | 30,158  | 0,25 | 53,171  | 0,25 | 53,756  | 0,25 | 59,805  |
| 0,26 | 33,73   | 0,26 | 56,382  | 0,26 | 58,336  | 0,26 | 63,302  |
| 0,27 | 37,153  | 0,27 | 58,411  | 0,27 | 61,908  | 0,27 | 65,642  |
| 0,28 | 40,351  | 0,28 | 59,294  | 0,28 | 64,347  | 0,28 | 66,936  |
| 0,29 | 43,289  | 0,29 | 59,244  | 0,29 | 65,754  | 0,29 | 67,285  |
| 0,3  | 45,89   | 0,3  | 58,473  | 0,3  | 66,152  | 0,3  | 66,886  |
| 0,31 | 48,13   | 0,31 | 57,191  | 0,31 | 65,704  | 0,31 | 65,891  |
| 0,32 | 49,972  | 0,32 | 55,573  | 0,32 | 64,571  | 0,32 | 64,459  |
| 0,33 | 51,403  | 0,33 | 53,818  | 0,33 | 62,978  | 0,33 | 62,767  |
| 0,34 | 52,412  | 0,34 | 52,001  | 0,34 | 61,062  | 0,34 | 60,925  |
| 0,35 | 53,046  | 0,35 | 50,184  | 0,35 | 58,958  | 0,35 | 59,008  |
| 0,36 | 53,295  | 0,36 | 48,429  | 0,36 | 56,793  | 0,36 | 57,079  |
| 0,37 | 53,221  | 0,37 | 46,761  | 0,37 | 54,627  | 0,37 | 55,199  |
| 0,38 | 52,872  | 0,38 | 45,193  | 0,38 | 52,511  | 0,38 | 53,382  |
| 0,39 | 52,275  | 0,39 | 43,724  | 0,39 | 50,507  | 0,39 | 51,665  |
| 0,4  | 51,503  | 0,4  | 42,33   | 0,4  | 48,591  | 0,4  | 50,034  |
| 0,41 | 50,57   | 0,41 | 41,048  | 0,41 | 46,798  | 0,41 | 48,479  |
| 0,42 | 49,537  | 0,42 | 39,854  | 0,42 | 45,143  | 0,42 | 47,035  |
| 0,43 | 48,441  | 0,43 | 38,721  | 0,43 | 43,587  | 0,43 | 45,653  |
| 0,44 | 47,296  | 0,44 | 37,688  | 0,44 | 42,144  | 0,44 | 44,396  |
| 0,45 | 46,139  | 0,45 | 36,705  | 0,45 | 40,812  | 0,45 | 43,189  |
| 0,46 | 44,981  | 0,46 | 35,796  | 0,46 | 39,567  | 0,46 | 42,056  |
| 0,47 | 43,824  | 0,47 | 34,937  | 0,47 | 38,41   | 0,47 | 40,998  |
| 0,48 | 42,704  | 0,48 | 34,141  | 0,48 | 37,352  | 0,48 | 40,015  |
| 0,49 | 41,596  | 0,49 | 33,394  | 0,49 | 36,331  | 0,49 | 39,069  |
| 0,5  | 40,538  | 0,5  | 32,685  | 0,5  | 35,41   | 0,5  | 38,198  |
| 0,51 | 39,505  | 0,51 | 32,012  | 0,51 | 34,552  | 0,51 | 37,364  |
| 0,52 | 38,522  | 0,52 | 31,39   | 0,52 | 33,742  | 0,52 | 36,58   |
| 0,53 | 37,576  | 0,53 | 30,805  | 0,53 | 32,996  | 0,53 | 35,833  |

|      |        |      |        |      |        |      |        |
|------|--------|------|--------|------|--------|------|--------|
| 0,54 | 36,667 | 0,54 | 30,245 | 0,54 | 32,299 | 0,54 | 35,124 |
| 0,55 | 35,796 | 0,55 | 29,722 | 0,55 | 31,639 | 0,55 | 34,464 |
| 0,56 | 34,975 | 0,56 | 29,225 | 0,56 | 31,042 | 0,56 | 33,83  |
| 0,57 | 34,178 | 0,57 | 28,764 | 0,57 | 30,482 | 0,57 | 33,245 |
| 0,58 | 33,431 | 0,58 | 28,316 | 0,58 | 29,959 | 0,58 | 32,672 |
| 0,59 | 32,722 | 0,59 | 27,893 | 0,59 | 29,474 | 0,59 | 32,137 |
| 0,6  | 32,037 | 0,6  | 27,495 | 0,6  | 29,025 | 0,6  | 31,627 |
| 0,61 | 31,39  | 0,61 | 27,146 | 0,61 | 28,627 | 0,61 | 31,129 |
| 0,62 | 30,768 | 0,62 | 26,798 | 0,62 | 28,254 | 0,62 | 30,681 |
| 0,63 | 30,183 | 0,63 | 26,474 | 0,63 | 27,943 | 0,63 | 30,245 |
| 0,64 | 29,635 | 0,64 | 26,188 | 0,64 | 27,656 | 0,64 | 29,822 |
| 0,65 | 29,1   | 0,65 | 25,901 | 0,65 | 27,432 | 0,65 | 29,424 |
| 0,66 | 28,615 | 0,66 | 25,665 | 0,66 | 27,258 | 0,66 | 29,063 |
| 0,67 | 28,142 | 0,67 | 25,453 | 0,67 | 27,134 | 0,67 | 28,702 |
| 0,68 | 27,694 | 0,68 | 25,279 | 0,68 | 27,059 | 0,68 | 28,378 |
| 0,69 | 27,27  | 0,69 | 25,117 | 0,69 | 27,071 | 0,69 | 28,067 |
| 0,7  | 26,872 | 0,7  | 25,005 | 0,7  | 27,121 | 0,7  | 27,781 |
| 0,69 | 26,051 | 0,69 | 24,072 | 0,69 | 25,391 | 0,69 | 26,997 |
| 0,68 | 25,391 | 0,68 | 23,4   | 0,68 | 24,283 | 0,68 | 26,387 |
| 0,67 | 24,819 | 0,67 | 22,877 | 0,67 | 23,45  | 0,67 | 25,852 |
| 0,66 | 24,283 | 0,66 | 22,441 | 0,66 | 22,765 | 0,66 | 25,391 |
| 0,65 | 23,798 | 0,65 | 22,056 | 0,65 | 22,193 | 0,65 | 24,943 |
| 0,64 | 23,338 | 0,64 | 21,695 | 0,64 | 21,695 | 0,64 | 24,545 |
| 0,63 | 22,89  | 0,63 | 21,371 | 0,63 | 21,247 | 0,63 | 24,159 |
| 0,62 | 22,466 | 0,62 | 21,048 | 0,62 | 20,861 | 0,62 | 23,798 |
| 0,61 | 22,056 | 0,61 | 20,786 | 0,61 | 20,475 | 0,61 | 23,45  |
| 0,6  | 21,657 | 0,6  | 20,512 | 0,6  | 20,151 | 0,6  | 23,114 |
| 0,59 | 21,272 | 0,59 | 20,251 | 0,59 | 19,815 | 0,59 | 22,79  |
| 0,58 | 20,898 | 0,58 | 20,014 | 0,58 | 19,529 | 0,58 | 22,479 |
| 0,57 | 20,525 | 0,57 | 19,765 | 0,57 | 19,243 | 0,57 | 22,18  |
| 0,56 | 20,151 | 0,56 | 19,541 | 0,56 | 18,969 | 0,56 | 21,894 |
| 0,55 | 19,79  | 0,55 | 19,305 | 0,55 | 18,708 | 0,55 | 21,608 |
| 0,54 | 19,43  | 0,54 | 19,081 | 0,54 | 18,446 | 0,54 | 21,321 |
| 0,53 | 19,056 | 0,53 | 18,869 | 0,53 | 18,21  | 0,53 | 21,035 |
| 0,52 | 18,683 | 0,52 | 18,67  | 0,52 | 17,961 | 0,52 | 20,774 |
| 0,51 | 18,322 | 0,51 | 18,446 | 0,51 | 17,724 | 0,51 | 20,5   |
| 0,5  | 17,948 | 0,5  | 18,247 | 0,5  | 17,488 | 0,5  | 20,238 |
| 0,49 | 17,563 | 0,49 | 18,036 | 0,49 | 17,239 | 0,49 | 19,965 |
| 0,48 | 17,177 | 0,48 | 17,836 | 0,48 | 17,015 | 0,48 | 19,691 |
| 0,47 | 16,791 | 0,47 | 17,637 | 0,47 | 16,778 | 0,47 | 19,43  |
| 0,46 | 16,38  | 0,46 | 17,438 | 0,46 | 16,53  | 0,46 | 19,168 |
| 0,45 | 15,97  | 0,45 | 17,239 | 0,45 | 16,293 | 0,45 | 18,894 |
| 0,44 | 15,534 | 0,44 | 17,015 | 0,44 | 16,032 | 0,44 | 18,608 |
| 0,43 | 15,098 | 0,43 | 16,803 | 0,43 | 15,77  | 0,43 | 18,322 |
| 0,42 | 14,638 | 0,42 | 16,567 | 0,42 | 15,496 | 0,42 | 18,011 |
| 0,41 | 14,165 | 0,41 | 16,343 | 0,41 | 15,223 | 0,41 | 17,712 |
| 0,4  | 13,667 | 0,4  | 16,094 | 0,4  | 14,924 | 0,4  | 17,376 |
| 0,39 | 13,157 | 0,39 | 15,833 | 0,39 | 14,575 | 0,39 | 17,027 |

|       |         |       |         |       |         |       |         |
|-------|---------|-------|---------|-------|---------|-------|---------|
| 0,38  | 12,597  | 0,38  | 15,534  | 0,38  | 14,227  | 0,38  | 16,642  |
| 0,37  | 12,024  | 0,37  | 15,198  | 0,37  | 13,816  | 0,37  | 16,243  |
| 0,36  | 11,414  | 0,36  | 14,837  | 0,36  | 13,368  | 0,36  | 15,77   |
| 0,35  | 10,767  | 0,35  | 14,389  | 0,35  | 12,821  | 0,35  | 15,235  |
| 0,34  | 10,07   | 0,34  | 13,854  | 0,34  | 12,211  | 0,34  | 14,6    |
| 0,33  | 9,311   | 0,33  | 13,219  | 0,33  | 11,452  | 0,33  | 13,878  |
| 0,32  | 8,489   | 0,32  | 12,397  | 0,32  | 10,543  | 0,32  | 12,995  |
| 0,31  | 7,593   | 0,31  | 11,364  | 0,31  | 9,386   | 0,31  | 11,912  |
| 0,3   | 6,598   | 0,3   | 10,033  | 0,3   | 7,954   | 0,3   | 10,568  |
| 0,29  | 5,453   | 0,29  | 8,315   | 0,29  | 6,174   | 0,29  | 8,888   |
| 0,28  | 4,171   | 0,28  | 6,112   | 0,28  | 3,934   | 0,28  | 6,784   |
| 0,27  | 2,714   | 0,27  | 3,324   | 0,27  | 1,159   | 0,27  | 4,171   |
| 0,26  | 1,034   | 0,26  | -0,148  | 0,26  | -2,202  | 0,26  | 0,91    |
| 0,25  | -0,907  | 0,25  | -4,38   | 0,25  | -6,234  | 0,25  | -3,073  |
| 0,24  | -3,135  | 0,24  | -9,445  | 0,24  | -10,964 | 0,24  | -7,84   |
| 0,23  | -5,659  | 0,23  | -15,245 | 0,23  | -16,328 | 0,23  | -13,453 |
| 0,22  | -8,545  | 0,22  | -21,655 | 0,22  | -22,265 | 0,22  | -19,838 |
| 0,21  | -11,775 | 0,21  | -28,426 | 0,21  | -28,525 | 0,21  | -26,845 |
| 0,2   | -15,35  | 0,2   | -35,271 | 0,2   | -34,997 | 0,2   | -34,275 |
| 0,19  | -19,227 | 0,19  | -41,855 | 0,19  | -41,32  | 0,19  | -41,83  |
| 0,18  | -23,336 | 0,18  | -47,817 | 0,18  | -47,244 | 0,18  | -49,099 |
| 0,17  | -27,667 | 0,17  | -52,832 | 0,17  | -52,596 | 0,17  | -55,782 |
| 0,16  | -31,985 | 0,16  | -56,691 | 0,16  | -57,101 | 0,16  | -61,52  |
| 0,15  | -36,279 | 0,15  | -59,28  | 0,15  | -60,661 | 0,15  | -66,075 |
| 0,14  | -40,424 | 0,14  | -60,674 | 0,14  | -63,262 | 0,14  | -69,361 |
| 0,13  | -44,257 | 0,13  | -61,009 | 0,13  | -64,905 | 0,13  | -71,34  |
| 0,12  | -47,729 | 0,12  | -60,487 | 0,12  | -65,677 | 0,12  | -72,161 |
| 0,11  | -50,729 | 0,11  | -59,354 | 0,11  | -65,702 | 0,11  | -71,974 |
| 0,1   | -53,193 | 0,1   | -57,836 | 0,1   | -65,117 | 0,1   | -71,029 |
| 0,09  | -55,122 | 0,09  | -56,068 | 0,09  | -64,034 | 0,09  | -69,56  |
| 0,08  | -56,504 | 0,08  | -54,214 | 0,08  | -62,665 | 0,08  | -67,73  |
| 0,07  | -57,375 | 0,07  | -52,347 | 0,07  | -61,034 | 0,07  | -65,739 |
| 0,06  | -57,773 | 0,06  | -50,53  | 0,06  | -59,304 | 0,06  | -63,648 |
| 0,05  | -57,773 | 0,05  | -48,788 | 0,05  | -57,512 | 0,05  | -61,557 |
| 0,04  | -57,438 | 0,04  | -47,145 | 0,04  | -55,708 | 0,04  | -59,541 |
| 0,03  | -56,815 | 0,03  | -45,601 | 0,03  | -53,928 | 0,03  | -57,612 |
| 0,02  | -55,994 | 0,02  | -44,145 | 0,02  | -52,223 | 0,02  | -55,77  |
| 0,01  | -55,01  | 0,01  | -42,813 | 0,01  | -50,592 | 0,01  | -54,04  |
| 0     | -53,94  | 0     | -41,556 | 0     | -49,049 | 0     | -52,422 |
| -0,01 | -52,758 | -0,01 | -40,386 | -0,01 | -47,58  | -0,01 | -50,891 |
| -0,02 | -51,575 | -0,02 | -39,291 | -0,02 | -46,199 | -0,02 | -49,46  |
| -0,03 | -50,343 | -0,03 | -38,283 | -0,03 | -44,892 | -0,03 | -48,128 |
| -0,04 | -49,123 | -0,04 | -37,325 | -0,04 | -43,685 | -0,04 | -46,883 |
| -0,05 | -47,916 | -0,05 | -36,441 | -0,05 | -42,552 | -0,05 | -45,713 |
| -0,06 | -46,746 | -0,06 | -35,607 | -0,06 | -41,494 | -0,06 | -44,606 |
| -0,07 | -45,589 | -0,07 | -34,811 | -0,07 | -40,498 | -0,07 | -43,573 |
| -0,08 | -44,469 | -0,08 | -34,064 | -0,08 | -39,565 | -0,08 | -42,602 |
| -0,09 | -43,386 | -0,09 | -33,367 | -0,09 | -38,681 | -0,09 | -41,681 |

|       |         |       |         |       |         |       |         |
|-------|---------|-------|---------|-------|---------|-------|---------|
| -0,1  | -42,353 | -0,1  | -32,707 | -0,1  | -37,86  | -0,1  | -40,822 |
| -0,11 | -41,345 | -0,11 | -32,072 | -0,11 | -37,088 | -0,11 | -40     |
| -0,12 | -40,386 | -0,12 | -31,487 | -0,12 | -36,379 | -0,12 | -39,229 |
| -0,13 | -39,478 | -0,13 | -30,952 | -0,13 | -35,694 | -0,13 | -38,495 |
| -0,14 | -38,594 | -0,14 | -30,417 | -0,14 | -35,034 | -0,14 | -37,81  |
| -0,15 | -37,748 | -0,15 | -29,907 | -0,15 | -34,462 | -0,15 | -37,15  |
| -0,16 | -36,951 | -0,16 | -29,446 | -0,16 | -33,914 | -0,16 | -36,528 |
| -0,17 | -36,192 | -0,17 | -29,011 | -0,17 | -33,379 | -0,17 | -35,931 |
| -0,18 | -35,458 | -0,18 | -28,625 | -0,18 | -32,894 | -0,18 | -35,371 |
| -0,19 | -34,761 | -0,19 | -28,251 | -0,19 | -32,446 | -0,19 | -34,848 |
| -0,2  | -34,101 | -0,2  | -27,915 | -0,2  | -32,01  | -0,2  | -34,338 |
| -0,21 | -33,466 | -0,21 | -27,617 | -0,21 | -31,637 | -0,21 | -33,865 |

**Data file for Fig 3d.** DPV of bare and modified electrodes in 0.96  $\mu$ M Nicotine.

| Bare GCE |             | GCE/N-CNS |             | GCE/PAMAM |             | GCE/N-CNS/PAMAM |             |
|----------|-------------|-----------|-------------|-----------|-------------|-----------------|-------------|
| E /V     | I / $\mu$ A | E /V      | I / $\mu$ A | E /V      | I / $\mu$ A | E /V            | I / $\mu$ A |
| 0,2      | 2,178       | 0,2       | 7,779       | 0,2       | 5,582       | 0,2             | 6,223       |
| 0,21     | 2,103       | 0,21      | 7,43        | 0,21      | 5,538       | 0,21            | 6,099       |
| 0,22     | 1,989       | 0,22      | 7,256       | 0,22      | 5,596       | 0,22            | 6,024       |
| 0,23     | 1,959       | 0,23      | 7,132       | 0,23      | 5,578       | 0,23            | 5,962       |
| 0,24     | 1,921       | 0,24      | 7,057       | 0,24      | 5,547       | 0,24            | 6,011       |
| 0,25     | 1,895       | 0,25      | 7,02        | 0,25      | 5,655       | 0,25            | 5,924       |
| 0,26     | 1,9         | 0,26      | 6,92        | 0,26      | 5,713       | 0,26            | 6,011       |
| 0,27     | 1,843       | 0,27      | 6,845       | 0,27      | 5,658       | 0,27            | 6,061       |
| 0,28     | 1,869       | 0,28      | 6,808       | 0,28      | 5,731       | 0,28            | 6,061       |
| 0,29     | 1,85        | 0,29      | 6,796       | 0,29      | 5,734       | 0,29            | 6,049       |
| 0,3      | 1,798       | 0,3       | 6,696       | 0,3       | 5,763       | 0,3             | 6,161       |
| 0,31     | 1,814       | 0,31      | 6,684       | 0,31      | 5,766       | 0,31            | 6,099       |
| 0,32     | 1,798       | 0,32      | 6,659       | 0,32      | 5,812       | 0,32            | 6,161       |
| 0,33     | 1,774       | 0,33      | 6,621       | 0,33      | 5,843       | 0,33            | 6,211       |
| 0,34     | 1,778       | 0,34      | 6,584       | 0,34      | 5,937       | 0,34            | 6,235       |
| 0,35     | 1,761       | 0,35      | 6,534       | 0,35      | 5,987       | 0,35            | 6,223       |
| 0,36     | 1,767       | 0,36      | 6,522       | 0,36      | 6,025       | 0,36            | 6,285       |
| 0,37     | 1,769       | 0,37      | 6,522       | 0,37      | 6,115       | 0,37            | 6,347       |
| 0,38     | 1,752       | 0,38      | 6,484       | 0,38      | 6,157       | 0,38            | 6,397       |
| 0,39     | 1,73        | 0,39      | 6,522       | 0,39      | 6,216       | 0,39            | 6,385       |
| 0,4      | 1,734       | 0,4       | 6,522       | 0,4       | 6,269       | 0,4             | 6,447       |
| 0,41     | 1,746       | 0,41      | 6,497       | 0,41      | 6,293       | 0,41            | 6,559       |
| 0,42     | 1,738       | 0,42      | 6,559       | 0,42      | 6,354       | 0,42            | 6,497       |
| 0,43     | 1,736       | 0,43      | 6,584       | 0,43      | 6,413       | 0,43            | 6,621       |
| 0,44     | 1,734       | 0,44      | 6,584       | 0,44      | 6,508       | 0,44            | 6,634       |
| 0,45     | 1,72        | 0,45      | 6,659       | 0,45      | 6,552       | 0,45            | 6,758       |
| 0,46     | 1,748       | 0,46      | 6,621       | 0,46      | 6,625       | 0,46            | 6,758       |

|      |        |      |        |      |        |      |        |
|------|--------|------|--------|------|--------|------|--------|
| 0,47 | 1,73   | 0,47 | 6,708  | 0,47 | 6,752  | 0,47 | 6,932  |
| 0,48 | 1,733  | 0,48 | 6,746  | 0,48 | 6,841  | 0,48 | 6,945  |
| 0,49 | 1,721  | 0,49 | 6,833  | 0,49 | 6,848  | 0,49 | 6,995  |
| 0,5  | 1,764  | 0,5  | 6,883  | 0,5  | 6,969  | 0,5  | 7,094  |
| 0,51 | 2,477  | 0,51 | 7,044  | 0,51 | 7,12   | 0,51 | 7,144  |
| 0,52 | 2,51   | 0,52 | 7,044  | 0,52 | 7,199  | 0,52 | 7,306  |
| 0,53 | 2,565  | 0,53 | 7,144  | 0,53 | 7,382  | 0,53 | 7,318  |
| 0,54 | 2,602  | 0,54 | 7,194  | 0,54 | 7,468  | 0,54 | 7,493  |
| 0,55 | 2,647  | 0,55 | 7,293  | 0,55 | 7,638  | 0,55 | 7,629  |
| 0,56 | 2,706  | 0,56 | 7,381  | 0,56 | 7,763  | 0,56 | 7,779  |
| 0,57 | 2,726  | 0,57 | 7,517  | 0,57 | 7,952  | 0,57 | 7,891  |
| 0,58 | 2,8    | 0,58 | 7,617  | 0,58 | 8,09   | 0,58 | 8,115  |
| 0,59 | 2,858  | 0,59 | 7,853  | 0,59 | 8,417  | 0,59 | 8,389  |
| 0,6  | 2,916  | 0,6  | 8,04   | 0,6  | 8,705  | 0,6  | 8,675  |
| 0,61 | 3,015  | 0,61 | 8,239  | 0,61 | 9,04   | 0,61 | 8,986  |
| 0,62 | 3,078  | 0,62 | 8,501  | 0,62 | 9,357  | 0,62 | 9,31   |
| 0,63 | 3,146  | 0,63 | 8,787  | 0,63 | 9,769  | 0,63 | 9,783  |
| 0,64 | 3,257  | 0,64 | 9,123  | 0,64 | 10,225 | 0,64 | 10,206 |
| 0,65 | 3,354  | 0,65 | 9,521  | 0,65 | 10,824 | 0,65 | 10,865 |
| 0,66 | 3,5    | 0,66 | 10,019 | 0,66 | 11,336 | 0,66 | 11,425 |
| 0,67 | 3,613  | 0,67 | 10,592 | 0,67 | 11,987 | 0,67 | 12,284 |
| 0,68 | 3,763  | 0,68 | 11,152 | 0,68 | 12,769 | 0,68 | 13,205 |
| 0,69 | 3,984  | 0,69 | 11,874 | 0,69 | 13,593 | 0,69 | 14,188 |
| 0,7  | 4,2    | 0,7  | 12,72  | 0,7  | 14,653 | 0,7  | 15,371 |
| 0,71 | 4,454  | 0,71 | 13,703 | 0,71 | 15,737 | 0,71 | 16,665 |
| 0,72 | 4,751  | 0,72 | 14,711 | 0,72 | 17,019 | 0,72 | 18,134 |
| 0,73 | 5,106  | 0,73 | 15,869 | 0,73 | 18,361 | 0,73 | 19,615 |
| 0,74 | 5,525  | 0,74 | 17,076 | 0,74 | 19,876 | 0,74 | 21,333 |
| 0,75 | 6,009  | 0,75 | 18,408 | 0,75 | 21,532 | 0,75 | 23,013 |
| 0,76 | 6,546  | 0,76 | 19,69  | 0,76 | 23,137 | 0,76 | 24,818 |
| 0,77 | 7,151  | 0,77 | 20,884 | 0,77 | 24,78  | 0,77 | 26,523 |
| 0,78 | 7,852  | 0,78 | 22,079 | 0,78 | 26,311 | 0,78 | 28,19  |
| 0,79 | 8,596  | 0,79 | 23,013 | 0,79 | 27,705 | 0,79 | 29,771 |
| 0,8  | 9,335  | 0,8  | 23,897 | 0,8  | 28,863 | 0,8  | 31,103 |
| 0,81 | 10,114 | 0,81 | 24,556 | 0,81 | 29,871 | 0,81 | 32,31  |
| 0,82 | 10,91  | 0,82 | 24,942 | 0,82 | 30,543 | 0,82 | 33,343 |
| 0,83 | 11,662 | 0,83 | 25,104 | 0,83 | 31,003 | 0,83 | 34,214 |
| 0,84 | 12,361 | 0,84 | 25,153 | 0,84 | 31,252 | 0,84 | 34,762 |
| 0,85 | 12,947 | 0,85 | 24,979 | 0,85 | 31,302 | 0,85 | 35,16  |
| 0,86 | 13,422 | 0,86 | 24,73  | 0,86 | 31,09  | 0,86 | 35,397 |
| 0,87 | 13,779 | 0,87 | 24,481 | 0,87 | 30,816 | 0,87 | 35,484 |
| 0,88 | 14,012 | 0,88 | 24,096 | 0,88 | 30,48  | 0,88 | 35,434 |
| 0,89 | 14,113 | 0,89 | 23,772 | 0,89 | 30,057 | 0,89 | 35,247 |
| 0,9  | 14,084 | 0,9  | 23,498 | 0,9  | 29,696 | 0,9  | 34,998 |
| 0,91 | 14,039 | 0,91 | 23,224 | 0,91 | 29,335 | 0,91 | 34,712 |
| 0,92 | 13,79  | 0,92 | 22,951 | 0,92 | 28,912 | 0,92 | 34,401 |
| 0,93 | 13,541 | 0,93 | 22,739 | 0,93 | 28,551 | 0,93 | 33,953 |
| 0,94 | 13,442 | 0,94 | 22,49  | 0,94 | 28,278 | 0,94 | 33,716 |

|      |        |      |        |      |        |      |        |
|------|--------|------|--------|------|--------|------|--------|
| 0,95 | 13,143 | 0,95 | 22,216 | 0,95 | 27,867 | 0,95 | 33,244 |
| 0,96 | 12,956 | 0,96 | 21,955 | 0,96 | 27,506 | 0,96 | 32,895 |
| 0,97 | 12,782 | 0,97 | 21,594 | 0,97 | 27,058 | 0,97 | 32,484 |
| 0,98 | 12,633 | 0,98 | 21,333 | 0,98 | 26,759 | 0,98 | 32,024 |
| 0,99 | 12,483 | 0,99 | 21,108 | 0,99 | 26,274 | 0,99 | 31,638 |
| 1    | 12,272 | 1    | 20,81  | 1    | 25,925 | 1    | 31,09  |
| 1,01 | 12,259 | 1,01 | 20,611 | 1,01 | 25,552 | 1,01 | 30,68  |
| 1,02 | 12,135 | 1,02 | 20,461 | 1,02 | 25,29  | 1,02 | 30,132 |
| 1,03 | 11,998 | 1,03 | 20,349 | 1,03 | 25,066 | 1,03 | 29,734 |
| 1,04 | 11,911 | 1,04 | 20,25  | 1,04 | 24,892 | 1,04 | 29,236 |
| 1,05 | 11,737 | 1,05 | 20,275 | 1,05 | 24,818 | 1,05 | 28,863 |
| 1,06 | 11,562 | 1,06 | 20,362 | 1,06 | 24,768 | 1,06 | 28,514 |
| 1,07 | 11,401 | 1,07 | 20,561 | 1,07 | 24,867 | 1,07 | 28,141 |
| 1,08 | 11,201 | 1,08 | 20,698 | 1,08 | 25,029 | 1,08 | 27,954 |
| 1,09 | 11,002 | 1,09 | 21,034 | 1,09 | 25,266 | 1,09 | 27,829 |
| 1,1  | 10,915 | 1,1  | 21,482 | 1,1  | 25,689 | 1,1  | 27,78  |
| 1,11 | 10,641 | 1,11 | 21,992 | 1,11 | 26,162 | 1,11 | 27,692 |
| 1,12 | 10,467 | 1,12 | 22,565 | 1,12 | 26,747 | 1,12 | 27,904 |
| 1,13 | 10,405 | 1,13 | 23,287 | 1,13 | 27,444 | 1,13 | 27,991 |
| 1,14 | 10,38  | 1,14 | 24,108 | 1,14 | 28,302 | 1,14 | 28,253 |
| 1,15 | 10,305 | 1,15 | 24,992 | 1,15 | 29,236 | 1,15 | 28,564 |
| 1,16 | 10,343 | 1,16 | 26,087 | 1,16 | 30,256 | 1,16 | 28,962 |
| 1,17 | 10,28  | 1,17 | 27,344 | 1,17 | 31,625 | 1,17 | 29,41  |
| 1,18 | 10,293 | 1,18 | 28,651 | 1,18 | 33,069 | 1,18 | 29,945 |
| 1,19 | 10,405 | 1,19 | 30,319 | 1,19 | 34,65  | 1,19 | 30,605 |
| 1,2  | 10,579 | 1,2  | 32,049 | 1,2  | 36,579 | 1,2  | 31,24  |

Data file for Fig 4a DPV of the sensor in nicotine from 0 to 62  $\mu\text{M}$ .

| Blank |                   | 1.93 $\mu\text{M}$ |                   | 3.85 $\mu\text{M}$ |                   | 7.7 $\mu\text{M}$ |                   | 15.4 $\mu\text{M}$ |                   | 30.8 $\mu\text{M}$ |                   | 61.64 $\mu\text{M}$ |                   |
|-------|-------------------|--------------------|-------------------|--------------------|-------------------|-------------------|-------------------|--------------------|-------------------|--------------------|-------------------|---------------------|-------------------|
| E /V  | I / $\mu\text{A}$ | E /V               | I / $\mu\text{A}$ | E /V               | I / $\mu\text{A}$ | E /V              | I / $\mu\text{A}$ | E /V               | I / $\mu\text{A}$ | E /V               | I / $\mu\text{A}$ | E /V                | I / $\mu\text{A}$ |
| 0,2   | 16,055            | 0,2                | 18,918            | 0,2                | 14,811            | 0,2               | 4,473             | 0,2                | 13,566            | 0,2                | 6,596             | 0,2                 | 20,436            |
| 0,21  | 15,433            | 0,21               | 17,798            | 0,21               | 13,691            | 0,21              | 4,506             | 0,21               | 13,566            | 0,21               | 6,596             | 0,21                | 20,237            |
| 0,22  | 15,047            | 0,22               | 17,362            | 0,22               | 13,355            | 0,22              | 4,448             | 0,22               | 13,604            | 0,22               | 6,584             | 0,22                | 20,051            |
| 0,23  | 14,786            | 0,23               | 16,976            | 0,23               | 13,155            | 0,23              | 4,47              | 0,23               | 13,616            | 0,23               | 6,547             | 0,23                | 19,876            |
| 0,24  | 14,686            | 0,24               | 16,727            | 0,24               | 13,118            | 0,24              | 4,439             | 0,24               | 13,741            | 0,24               | 6,584             | 0,24                | 19,628            |
| 0,25  | 14,525            | 0,25               | 16,479            | 0,25               | 12,832            | 0,25              | 4,459             | 0,25               | 13,778            | 0,25               | 6,609             | 0,25                | 19,553            |
| 0,26  | 14,437            | 0,26               | 16,18             | 0,26               | 12,795            | 0,26              | 4,506             | 0,26               | 13,79             | 0,26               | 6,609             | 0,26                | 19,366            |
| 0,27  | 14,363            | 0,27               | 16,03             | 0,27               | 12,608            | 0,27              | 4,48              | 0,27               | 13,828            | 0,27               | 6,634             | 0,27                | 19,354            |
| 0,28  | 14,213            | 0,28               | 15,894            | 0,28               | 12,496            | 0,28              | 4,43              | 0,28               | 13,815            | 0,28               | 6,684             | 0,28                | 19,254            |
| 0,29  | 14,151            | 0,29               | 15,67             | 0,29               | 12,409            | 0,29              | 4,464             | 0,29               | 13,84             | 0,29               | 6,572             | 0,29                | 19,254            |
| 0,3   | 14,164            | 0,3                | 15,471            | 0,3                | 12,322            | 0,3               | 4,547             | 0,3                | 13,865            | 0,3                | 6,671             | 0,3                 | 19,204            |
| 0,31  | 14,089            | 0,31               | 15,371            | 0,31               | 12,259            | 0,31              | 4,535             | 0,31               | 13,89             | 0,31               | 6,646             | 0,31                | 19,179            |
| 0,32  | 13,977            | 0,32               | 15,222            | 0,32               | 12,197            | 0,32              | 4,567             | 0,32               | 13,877            | 0,32               | 6,621             | 0,32                | 19,204            |
| 0,33  | 13,964            | 0,33               | 15,085            | 0,33               | 12,172            | 0,33              | 4,552             | 0,33               | 13,84             | 0,33               | 6,659             | 0,33                | 19,291            |
| 0,34  | 13,902            | 0,34               | 14,998            | 0,34               | 12,172            | 0,34              | 4,54              | 0,34               | 13,803            | 0,34               | 6,621             | 0,34                | 19,291            |
| 0,35  | 13,865            | 0,35               | 14,861            | 0,35               | 12,122            | 0,35              | 4,585             | 0,35               | 13,865            | 0,35               | 6,721             | 0,35                | 19,329            |
| 0,36  | 13,852            | 0,36               | 14,699            | 0,36               | 11,849            | 0,36              | 4,612             | 0,36               | 13,852            | 0,36               | 6,646             | 0,36                | 19,391            |
| 0,37  | 13,84             | 0,37               | 14,612            | 0,37               | 11,762            | 0,37              | 4,605             | 0,37               | 13,865            | 0,37               | 6,758             | 0,37                | 19,453            |
| 0,38  | 13,852            | 0,38               | 14,475            | 0,38               | 11,786            | 0,38              | 4,676             | 0,38               | 13,915            | 0,38               | 6,721             | 0,38                | 19,441            |
| 0,39  | 13,778            | 0,39               | 14,413            | 0,39               | 11,874            | 0,39              | 4,648             | 0,39               | 13,94             | 0,39               | 6,833             | 0,39                | 19,553            |
| 0,4   | 13,828            | 0,4                | 14,375            | 0,4                | 11,724            | 0,4               | 4,611             | 0,4                | 13,94             | 0,4                | 6,771             | 0,4                 | 19,578            |
| 0,41  | 13,803            | 0,41               | 14,263            | 0,41               | 11,674            | 0,41              | 4,697             | 0,41               | 13,94             | 0,41               | 6,858             | 0,41                | 19,739            |
| 0,42  | 13,84             | 0,42               | 14,176            | 0,42               | 11,637            | 0,42              | 4,719             | 0,42               | 13,964            | 0,42               | 6,883             | 0,42                | 19,764            |
| 0,43  | 13,94             | 0,43               | 14,176            | 0,43               | 11,612            | 0,43              | 4,697             | 0,43               | 14,002            | 0,43               | 6,982             | 0,43                | 19,988            |
| 0,44  | 13,89             | 0,44               | 14,076            | 0,44               | 11,6              | 0,44              | 4,81              | 0,44               | 14,039            | 0,44               | 6,995             | 0,44                | 20,138            |
| 0,45  | 14,027            | 0,45               | 14,089            | 0,45               | 11,537            | 0,45              | 4,764             | 0,45               | 14,114            | 0,45               | 7,094             | 0,45                | 20,387            |



|      |        |      |        |      |        |      |        |      |        |      |        |      |         |
|------|--------|------|--------|------|--------|------|--------|------|--------|------|--------|------|---------|
| 0,46 | 14,039 | 0,46 | 14,114 | 0,46 | 11,475 | 0,46 | 4,865  | 0,46 | 14,176 | 0,46 | 7,156  | 0,46 | 20,673  |
| 0,47 | 14,164 | 0,47 | 14,089 | 0,47 | 11,55  | 0,47 | 4,942  | 0,47 | 14,313 | 0,47 | 7,368  | 0,47 | 20,947  |
| 0,48 | 14,313 | 0,48 | 14,126 | 0,48 | 11,612 | 0,48 | 4,959  | 0,48 | 14,45  | 0,48 | 7,468  | 0,48 | 21,37   |
| 0,49 | 14,462 | 0,49 | 14,126 | 0,49 | 11,55  | 0,49 | 5,057  | 0,49 | 14,562 | 0,49 | 7,592  | 0,49 | 21,905  |
| 0,5  | 14,537 | 0,5  | 14,139 | 0,5  | 11,587 | 0,5  | 5,095  | 0,5  | 14,724 | 0,5  | 7,853  | 0,5  | 22,478  |
| 0,51 | 14,711 | 0,51 | 14,238 | 0,51 | 11,649 | 0,51 | 5,207  | 0,51 | 14,985 | 0,51 | 8,078  | 0,51 | 23,361  |
| 0,52 | 14,761 | 0,52 | 14,251 | 0,52 | 11,625 | 0,52 | 5,25   | 0,52 | 15,271 | 0,52 | 8,438  | 0,52 | 24,257  |
| 0,53 | 14,886 | 0,53 | 14,35  | 0,53 | 11,811 | 0,53 | 5,401  | 0,53 | 15,558 | 0,53 | 8,874  | 0,53 | 25,477  |
| 0,54 | 15,047 | 0,54 | 14,4   | 0,54 | 11,886 | 0,54 | 5,53   | 0,54 | 15,906 | 0,54 | 9,335  | 0,54 | 27,095  |
| 0,55 | 15,147 | 0,55 | 14,587 | 0,55 | 11,986 | 0,55 | 5,776  | 0,55 | 16,404 | 0,55 | 9,969  | 0,55 | 28,925  |
| 0,56 | 15,321 | 0,56 | 14,761 | 0,56 | 12,222 | 0,56 | 5,969  | 0,56 | 17,014 | 0,56 | 10,766 | 0,56 | 31,264  |
| 0,57 | 15,471 | 0,57 | 14,886 | 0,57 | 12,259 | 0,57 | 6,192  | 0,57 | 17,736 | 0,57 | 11,737 | 0,57 | 34,04   |
| 0,58 | 15,582 | 0,58 | 15,172 | 0,58 | 12,409 | 0,58 | 6,562  | 0,58 | 18,682 | 0,58 | 12,907 | 0,58 | 37,239  |
| 0,59 | 15,819 | 0,59 | 15,408 | 0,59 | 12,658 | 0,59 | 6,912  | 0,59 | 19,789 | 0,59 | 14,3   | 0,59 | 40,96   |
| 0,6  | 15,906 | 0,6  | 15,831 | 0,6  | 12,869 | 0,6  | 7,448  | 0,6  | 21,084 | 0,6  | 16,03  | 0,6  | 45,266  |
| 0,61 | 16,068 | 0,61 | 16,292 | 0,61 | 13,218 | 0,61 | 8,035  | 0,61 | 22,602 | 0,61 | 17,972 | 0,61 | 49,934  |
| 0,62 | 16,317 | 0,62 | 16,889 | 0,62 | 13,765 | 0,62 | 8,826  | 0,62 | 24,506 | 0,62 | 20,287 | 0,62 | 55,149  |
| 0,63 | 16,491 | 0,63 | 17,462 | 0,63 | 14,251 | 0,63 | 9,745  | 0,63 | 26,597 | 0,63 | 22,963 | 0,63 | 60,6    |
| 0,64 | 16,591 | 0,64 | 18,321 | 0,64 | 14,96  | 0,64 | 10,767 | 0,64 | 29,099 | 0,64 | 26,025 | 0,64 | 66,549  |
| 0,65 | 16,889 | 0,65 | 19,341 | 0,65 | 15,719 | 0,65 | 12,09  | 0,65 | 31,85  | 0,65 | 29,423 | 0,65 | 72,449  |
| 0,66 | 17,039 | 0,66 | 20,499 | 0,66 | 16,578 | 0,66 | 13,607 | 0,66 | 34,924 | 0,66 | 33,256 | 0,66 | 78,56   |
| 0,67 | 17,238 | 0,67 | 21,905 | 0,67 | 17,673 | 0,67 | 15,406 | 0,67 | 38,284 | 0,67 | 37,376 | 0,67 | 84,546  |
| 0,68 | 17,375 | 0,68 | 23,461 | 0,68 | 18,893 | 0,68 | 17,511 | 0,68 | 41,943 | 0,68 | 41,707 | 0,68 | 90,607  |
| 0,69 | 17,537 | 0,69 | 25,241 | 0,69 | 20,449 | 0,69 | 19,839 | 0,69 | 45,764 | 0,69 | 46,362 | 0,69 | 96,37   |
| 0,7  | 17,648 | 0,7  | 27,282 | 0,7  | 22,166 | 0,7  | 22,453 | 0,7  | 49,759 | 0,7  | 51,203 | 0,7  | 101,971 |
| 0,71 | 17,947 | 0,71 | 29,398 | 0,71 | 24,158 | 0,71 | 25,39  | 0,71 | 53,767 | 0,71 | 56,07  | 0,71 | 107,211 |
| 0,72 | 18,072 | 0,72 | 31,75  | 0,72 | 26,361 | 0,72 | 28,589 | 0,72 | 57,812 | 0,72 | 60,861 | 0,72 | 112,276 |
| 0,73 | 18,271 | 0,73 | 34,152 | 0,73 | 28,626 | 0,73 | 31,887 | 0,73 | 61,708 | 0,73 | 65,69  | 0,73 | 116,732 |
| 0,74 | 18,37  | 0,74 | 36,654 | 0,74 | 31,277 | 0,74 | 35,384 | 0,74 | 65,491 | 0,74 | 70,196 | 0,74 | 121,125 |
| 0,75 | 18,619 | 0,75 | 39,205 | 0,75 | 33,841 | 0,75 | 38,931 | 0,75 | 69,088 | 0,75 | 74,652 | 0,75 | 124,996 |
| 0,76 | 18,818 | 0,76 | 41,582 | 0,76 | 36,542 | 0,76 | 42,491 | 0,76 | 72,424 | 0,76 | 78,734 | 0,76 | 128,569 |

|      |        |      |        |      |        |      |        |      |        |      |         |      |         |
|------|--------|------|--------|------|--------|------|--------|------|--------|------|---------|------|---------|
| 0,77 | 19,055 | 0,77 | 43,848 | 0,77 | 39,454 | 0,77 | 45,914 | 0,77 | 75,485 | 0,77 | 82,48   | 0,77 | 131,68  |
| 0,78 | 19,242 | 0,78 | 46,026 | 0,78 | 42,13  | 0,78 | 49,262 | 0,78 | 78,186 | 0,78 | 85,978  | 0,78 | 134,543 |
| 0,79 | 19,515 | 0,79 | 47,967 | 0,79 | 44,619 | 0,79 | 52,323 | 0,79 | 80,713 | 0,79 | 89,014  | 0,79 | 136,907 |
| 0,8  | 19,69  | 0,8  | 49,635 | 0,8  | 47,183 | 0,8  | 55,298 | 0,8  | 82,841 | 0,8  | 91,815  | 0,8  | 139,023 |
| 0,81 | 19,951 | 0,81 | 51,079 | 0,81 | 49,473 | 0,81 | 57,899 | 0,81 | 84,795 | 0,81 | 94,043  | 0,81 | 140,641 |
| 0,82 | 20,138 | 0,82 | 52,174 | 0,82 | 51,626 | 0,82 | 60,239 | 0,82 | 86,463 | 0,82 | 95,997  | 0,82 | 142,135 |
| 0,83 | 20,399 | 0,83 | 53,082 | 0,83 | 53,431 | 0,83 | 62,268 | 0,83 | 87,932 | 0,83 | 97,615  | 0,83 | 143,379 |
| 0,84 | 20,685 | 0,84 | 53,755 | 0,84 | 55,024 | 0,84 | 64,035 | 0,84 | 89,151 | 0,84 | 98,946  | 0,84 | 144,002 |
| 0,85 | 20,909 | 0,85 | 54,066 | 0,85 | 56,318 | 0,85 | 65,479 | 0,85 | 90,222 | 0,85 | 99,867  | 0,85 | 144,749 |
| 0,86 | 21,245 | 0,86 | 54,19  | 0,86 | 57,401 | 0,86 | 66,636 | 0,86 | 91,13  | 0,86 | 100,689 | 0,86 | 145,122 |
| 0,87 | 21,519 | 0,87 | 54,103 | 0,87 | 58,198 | 0,87 | 67,495 | 0,87 | 91,777 | 0,87 | 101,236 | 0,87 | 145,122 |
| 0,88 | 21,781 | 0,88 | 53,879 | 0,88 | 58,758 | 0,88 | 68,192 | 0,88 | 92,425 | 0,88 | 101,56  | 0,88 | 144,997 |
| 0,89 | 22,03  | 0,89 | 53,506 | 0,89 | 59,082 | 0,89 | 68,578 | 0,89 | 92,785 | 0,89 | 101,56  | 0,89 | 144,873 |
| 0,9  | 22,428 | 0,9  | 53,058 | 0,9  | 59,318 | 0,9  | 68,827 | 0,9  | 93,084 | 0,9  | 101,685 | 0,9  | 144,375 |
| 0,91 | 22,689 | 0,91 | 52,473 | 0,91 | 59,355 | 0,91 | 68,852 | 0,91 | 93,209 | 0,91 | 101,56  | 0,91 | 144,002 |
| 0,92 | 23,013 | 0,92 | 51,962 | 0,92 | 59,268 | 0,92 | 68,814 | 0,92 | 93,222 | 0,92 | 101,436 | 0,92 | 143,379 |
| 0,93 | 23,374 | 0,93 | 51,377 | 0,93 | 59,156 | 0,93 | 68,653 | 0,93 | 93,097 | 0,93 | 100,938 | 0,93 | 142,633 |
| 0,94 | 23,71  | 0,94 | 50,743 | 0,94 | 58,932 | 0,94 | 68,428 | 0,94 | 93,097 | 0,94 | 100,44  | 0,94 | 141,886 |
| 0,95 | 24,096 | 0,95 | 50,12  | 0,95 | 58,546 | 0,95 | 68,142 | 0,95 | 92,848 | 0,95 | 99,942  | 0,95 | 141,139 |
| 0,96 | 24,481 | 0,96 | 49,398 | 0,96 | 58,248 | 0,96 | 67,806 | 0,96 | 92,599 | 0,96 | 99,32   | 0,96 | 140,268 |
| 0,97 | 24,867 | 0,97 | 48,639 | 0,97 | 57,849 | 0,97 | 67,433 | 0,97 | 92,101 | 0,97 | 98,822  | 0,97 | 139,272 |
| 0,98 | 25,278 | 0,98 | 47,818 | 0,98 | 57,675 | 0,98 | 66,96  | 0,98 | 91,852 | 0,98 | 98,076  | 0,98 | 138,277 |
| 0,99 | 25,676 | 0,99 | 46,872 | 0,99 | 57,028 | 0,99 | 66,562 | 0,99 | 91,23  | 0,99 | 97,453  | 0,99 | 137,156 |
| 1    | 26,149 | 1    | 45,939 | 1    | 56,48  | 1    | 66,089 | 1    | 90,857 | 1    | 96,706  | 1    | 136,036 |
| 1,01 | 26,56  | 1,01 | 44,955 | 1,01 | 55,933 | 1,01 | 65,591 | 1,01 | 90,359 | 1,01 | 95,96   | 1,01 | 134,792 |
| 1,02 | 27,095 | 1,02 | 43,91  | 1,02 | 55,41  | 1,02 | 64,956 | 1,02 | 89,737 | 1,02 | 94,964  | 1,02 | 133,671 |
| 1,03 | 27,593 | 1,03 | 42,852 | 1,03 | 54,725 | 1,03 | 64,396 | 1,03 | 89,114 | 1,03 | 94,217  | 1,03 | 132,427 |
| 1,04 | 28,215 | 1,04 | 41,856 | 1,04 | 53,954 | 1,04 | 63,749 | 1,04 | 88,367 | 1,04 | 93,346  | 1,04 | 130,933 |
| 1,05 | 28,651 | 1,05 | 40,823 | 1,05 | 53,344 | 1,05 | 63,002 | 1,05 | 87,621 | 1,05 | 92,599  | 1,05 | 129,44  |
| 1,06 | 29,286 | 1,06 | 39,939 | 1,06 | 52,522 | 1,06 | 62,268 | 1,06 | 86,999 | 1,06 | 91,728  | 1,06 | 127,822 |
| 1,07 | 29,871 | 1,07 | 39,043 | 1,07 | 51,875 | 1,07 | 61,397 | 1,07 | 86,252 | 1,07 | 90,732  | 1,07 | 126,204 |

|      |        |      |        |      |        |      |        |      |        |      |        |      |         |
|------|--------|------|--------|------|--------|------|--------|------|--------|------|--------|------|---------|
| 1,08 | 30,642 | 1,08 | 38,309 | 1,08 | 51,116 | 1,08 | 60,637 | 1,08 | 85,505 | 1,08 | 89,737 | 1,08 | 124,461 |
| 1,09 | 31,252 | 1,09 | 37,687 | 1,09 | 50,419 | 1,09 | 59,803 | 1,09 | 84,634 | 1,09 | 88,865 | 1,09 | 122,594 |
| 1,1  | 32,061 | 1,1  | 37,201 | 1,1  | 49,959 | 1,1  | 58,957 | 1,1  | 83,887 | 1,1  | 87,621 | 1,1  | 120,727 |
| 1,11 | 32,845 | 1,11 | 36,803 | 1,11 | 49,274 | 1,11 | 58,123 | 1,11 | 82,767 | 1,11 | 86,625 | 1,11 | 118,736 |
| 1,12 | 33,741 | 1,12 | 36,554 | 1,12 | 48,714 | 1,12 | 57,401 | 1,12 | 81,895 | 1,12 | 85,629 | 1,12 | 116,745 |
| 1,13 | 34,6   | 1,13 | 36,455 | 1,13 | 48,44  | 1,13 | 56,667 | 1,13 | 81,024 | 1,13 | 84,385 | 1,13 | 114,753 |
| 1,14 | 35,633 | 1,14 | 36,392 | 1,14 | 48,054 | 1,14 | 56,02  | 1,14 | 80,153 | 1,14 | 83,016 | 1,14 | 112,513 |
| 1,15 | 36,604 | 1,15 | 36,517 | 1,15 | 47,843 | 1,15 | 55,373 | 1,15 | 79,282 | 1,15 | 82,144 | 1,15 | 110,273 |
| 1,16 | 37,786 | 1,16 | 36,703 | 1,16 | 47,805 | 1,16 | 54,85  | 1,16 | 78,411 | 1,16 | 81,024 | 1,16 | 108,032 |
| 1,17 | 38,894 | 1,17 | 37,102 | 1,17 | 47,955 | 1,17 | 54,414 | 1,17 | 77,664 | 1,17 | 79,904 | 1,17 | 106,166 |
| 1,18 | 40,114 | 1,18 | 37,5   | 1,18 | 48,092 | 1,18 | 54,016 | 1,18 | 76,917 | 1,18 | 78,784 | 1,18 | 104,05  |
| 1,19 | 41,383 | 1,19 | 38,11  | 1,19 | 48,291 | 1,19 | 53,767 | 1,19 | 76,17  | 1,19 | 77,788 | 1,19 | 102,183 |
| 1,2  | 42,653 | 1,2  | 38,819 | 1,2  | 48,764 | 1,2  | 53,468 | 1,2  | 75,548 | 1,2  | 76,917 | 1,2  | 100,191 |
